# Supplementary material for: Directly visualizing the sign change of d-wave superconducting gap in Bi2Sr2CaCu2O8+δ by phase-referenced quasiparticle interference
Source: PubMed Central journal article supplement (PMC6453940; doi:10.1038/s41467-019-09340-5), 2019-04-08
Supplement: 41467_2019_9340_MOESM1_ESM.pdf [file 41467_2019_9340_MOESM1_ESM.pdf]

## Supplementary Information

Directly visualizing the sign change of *d*-wave superconducting gap in

$\text{Bi}_2\text{Sr}_2\text{CaCu}_2\text{O}_{8+\delta}$  by phase-referenced quasiparticle interference

Qiangqiang Gu, et al.

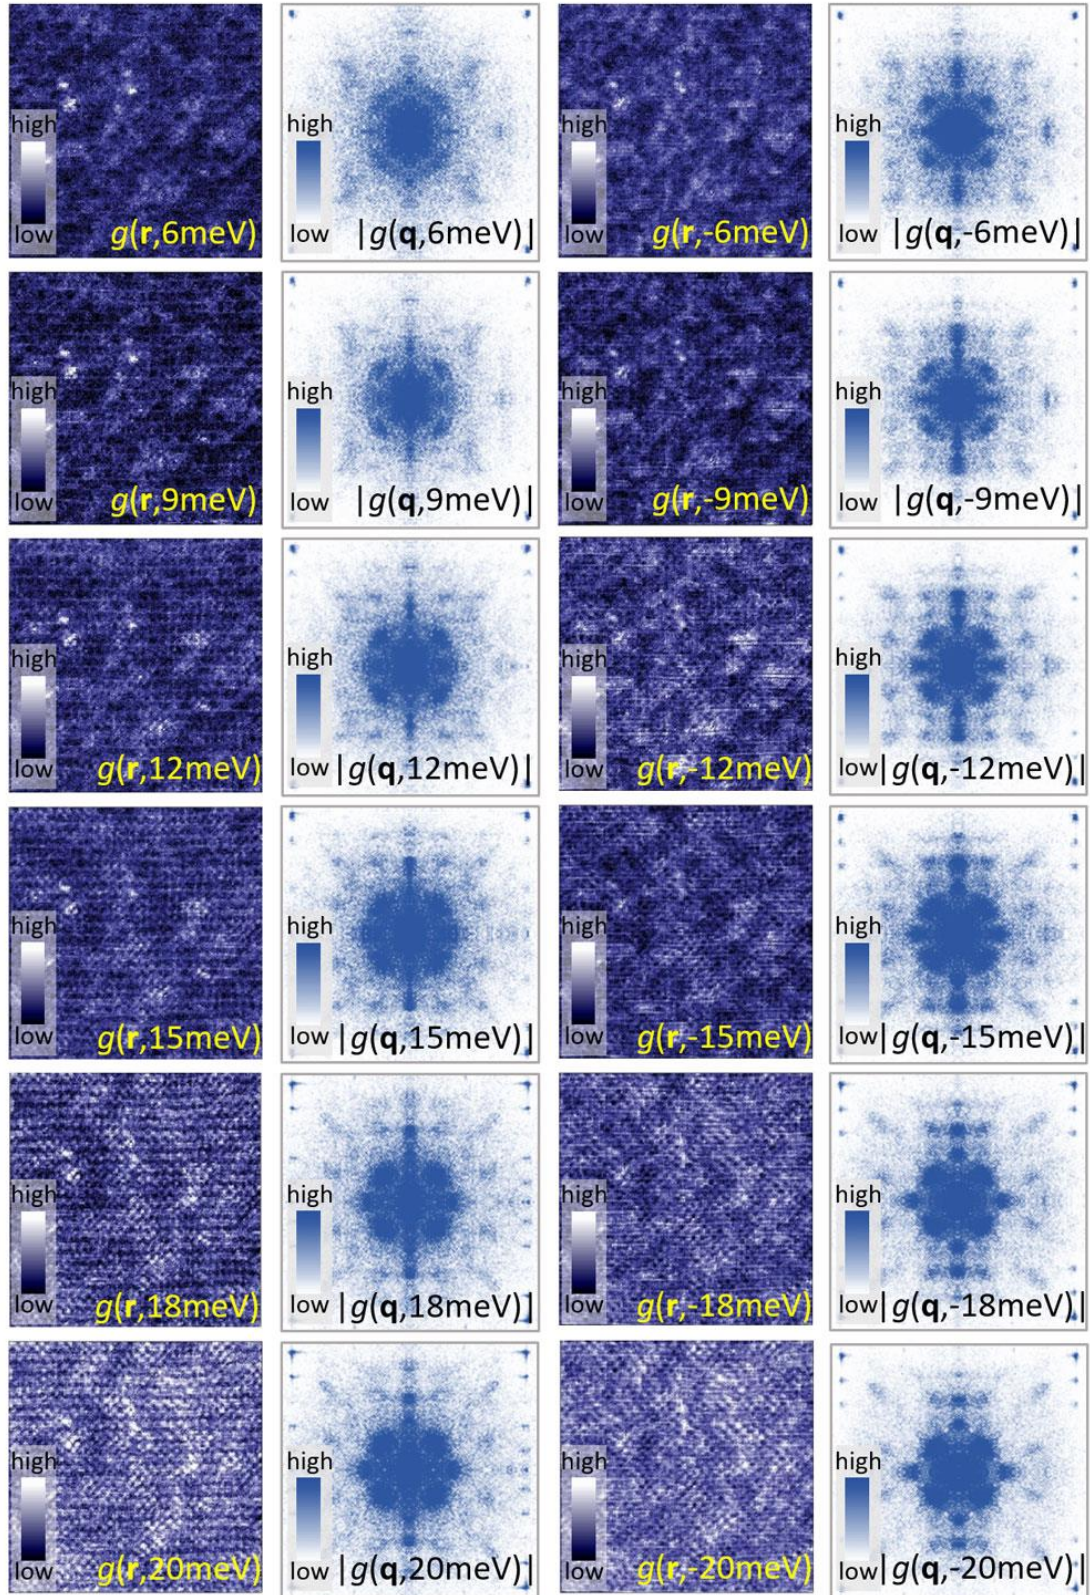

**Supplementary Figure 1** Measured QPI images and corresponding FT-QPI patterns at different energies on Bi-2212.  $V_{\text{set}} = -100$  mV,  $I_{\text{set}} = 100$  pA.

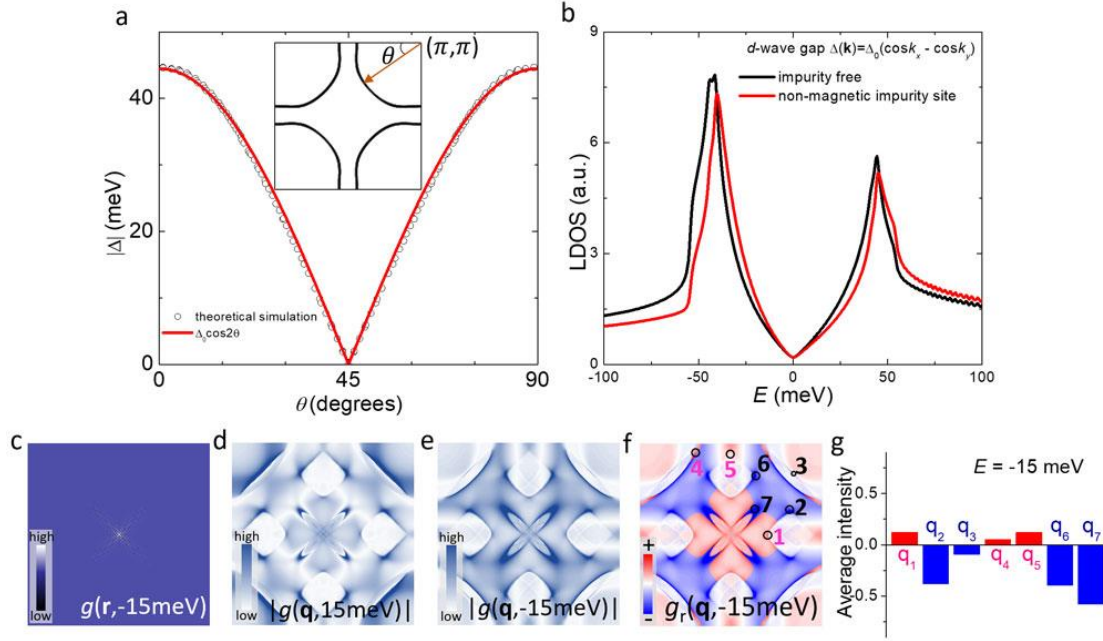

**Supplementary Figure 2** Theoretical calculated tunneling spectra and PR-QPI results in a *d*-wave superconductor. **a** Fermi surface and gap function calculated for a *d*-wave superconductor. The inset in **a** shows the calculated Fermi surface and the definition of the parameter angle  $\theta$ . The *d*-wave gap function  $\Delta(\mathbf{k}) = \Delta_0(\cos k_x - \cos k_y)$  with  $\Delta_0 = 23$  meV is assigned to the Fermi surface, and the resultant angle  $\theta$  dependent superconducting gap along the Fermi surface is shown in **a**. The gap function along the Fermi surface (open symbols) is consistent with a *d*-wave function  $\Delta(\theta) = 44.5 \cos 2\theta$  meV. **b** The tunneling spectra in an impurity-free area and on site of the non-magnetic impurity. The scattering scalar potential is set to  $V_s = 20$  meV for the non-magnetic impurity. **c** Simulated LDOS at  $-15$  meV around the single non-magnetic impurity with dimensions of  $512 \times 512$  atom lattice. The impurity is set to be at the center of the image. **d,e** FT-QPI patterns for the single impurity at  $\pm 15$  meV. **f** The resultant PR-QPI image  $g_r(\mathbf{q}, -15$  meV) calculated by DBS-QPI method from the simulation results in **d** and **e**. **g** Average intensity per pixel for the characteristic scattering spots in **f**. One can find that the  $g_r(\mathbf{q}, -15$  meV) values near gap-sign-preserved scattering vectors  $\mathbf{q}_1$ ,  $\mathbf{q}_4$ , and  $\mathbf{q}_5$  are positive, while the values near gap-sign-reversed scattering vectors  $\mathbf{q}_2$ ,  $\mathbf{q}_3$ ,  $\mathbf{q}_6$ , and  $\mathbf{q}_7$  are negative.

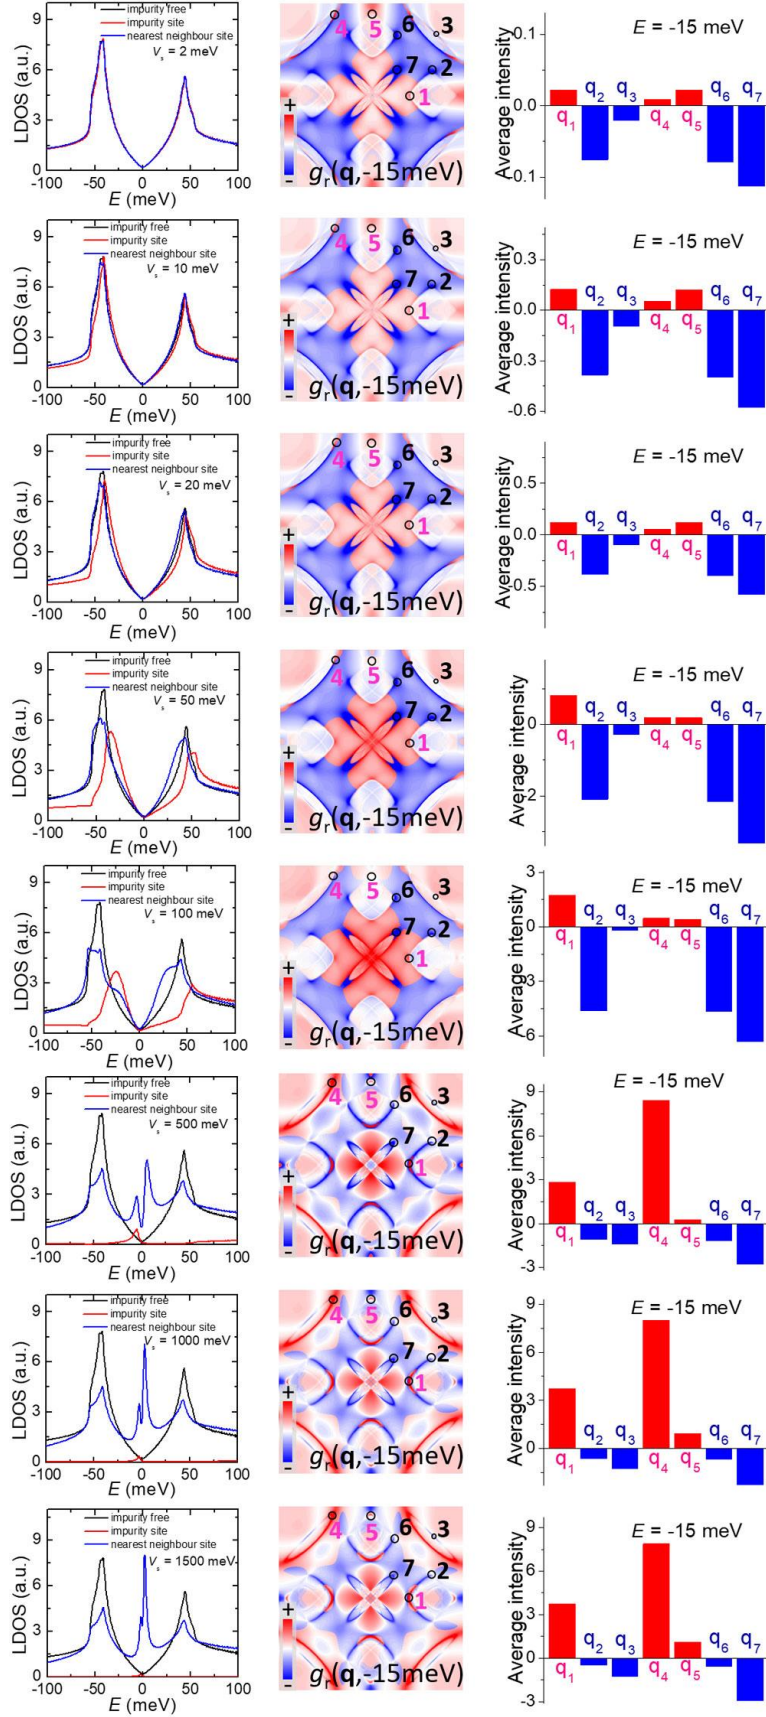

**Supplementary Figure 3** Simulated results around a single non-magnetic impurity with different positive scattering potentials in a  $d$ -wave superconductor.

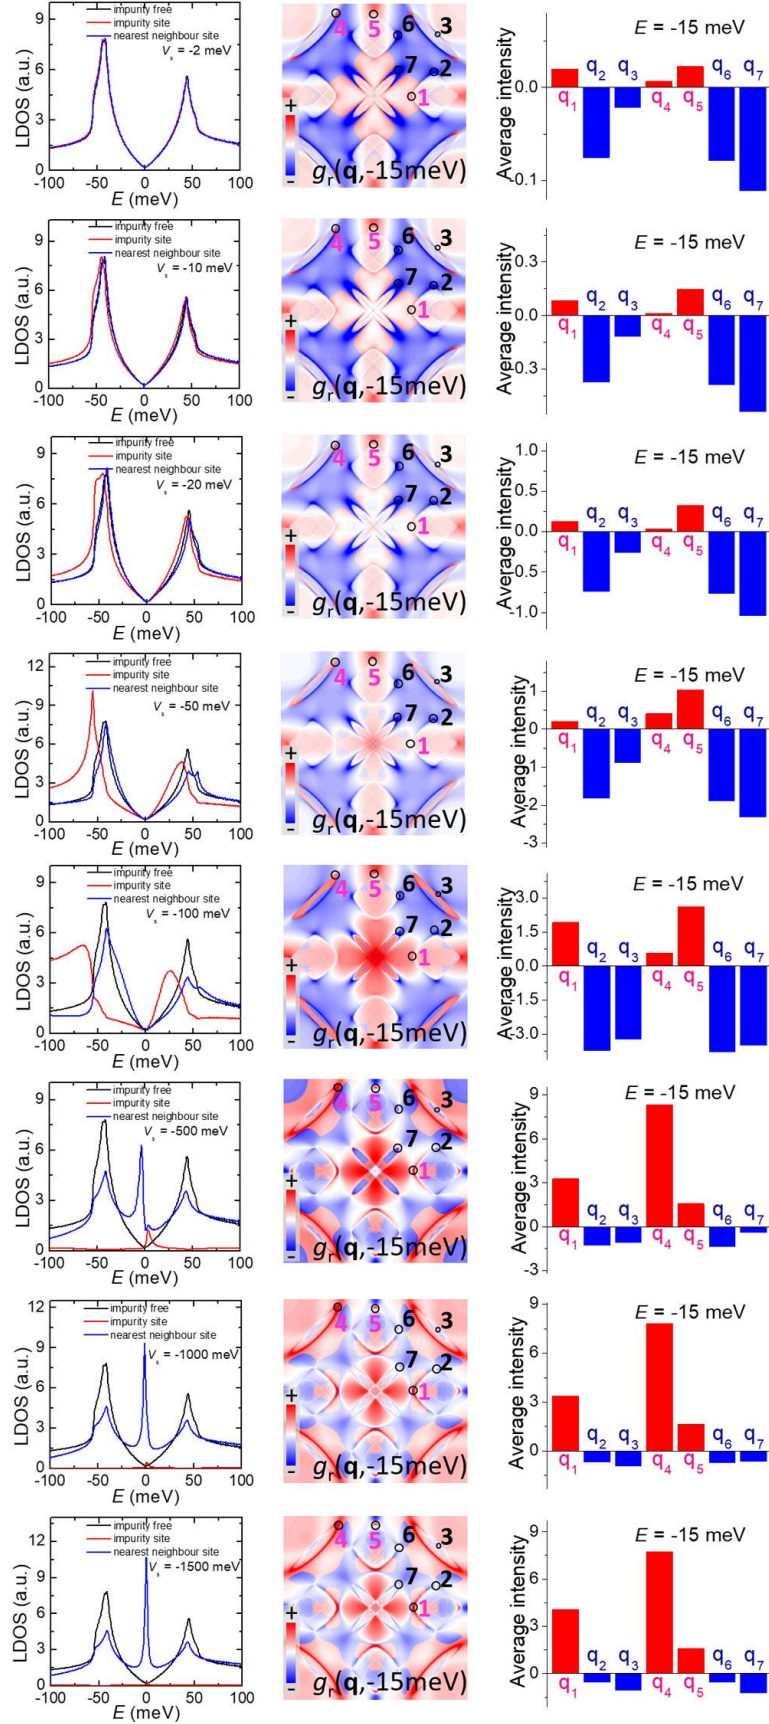

**Supplementary Figure 4** Simulated results around a single non-magnetic impurity with different negative scattering potentials in a  $d$ -wave superconductor.

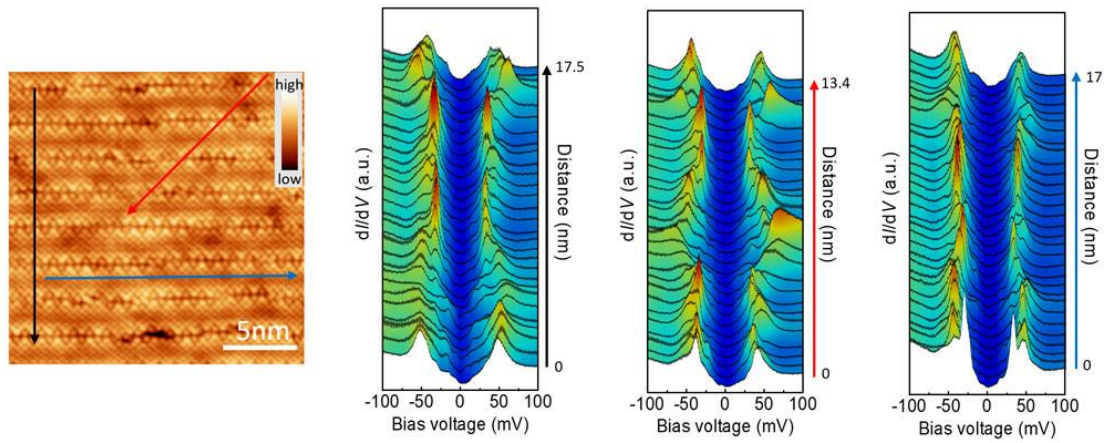

**Supplementary Figure 5** Topographic image ( $V_{\text{bias}} = -200$  mV,  $I_t = 50$  pA) and tunneling spectra measured on Bi-2212. The spectra are measured along different arrowed lines in the topographic image.

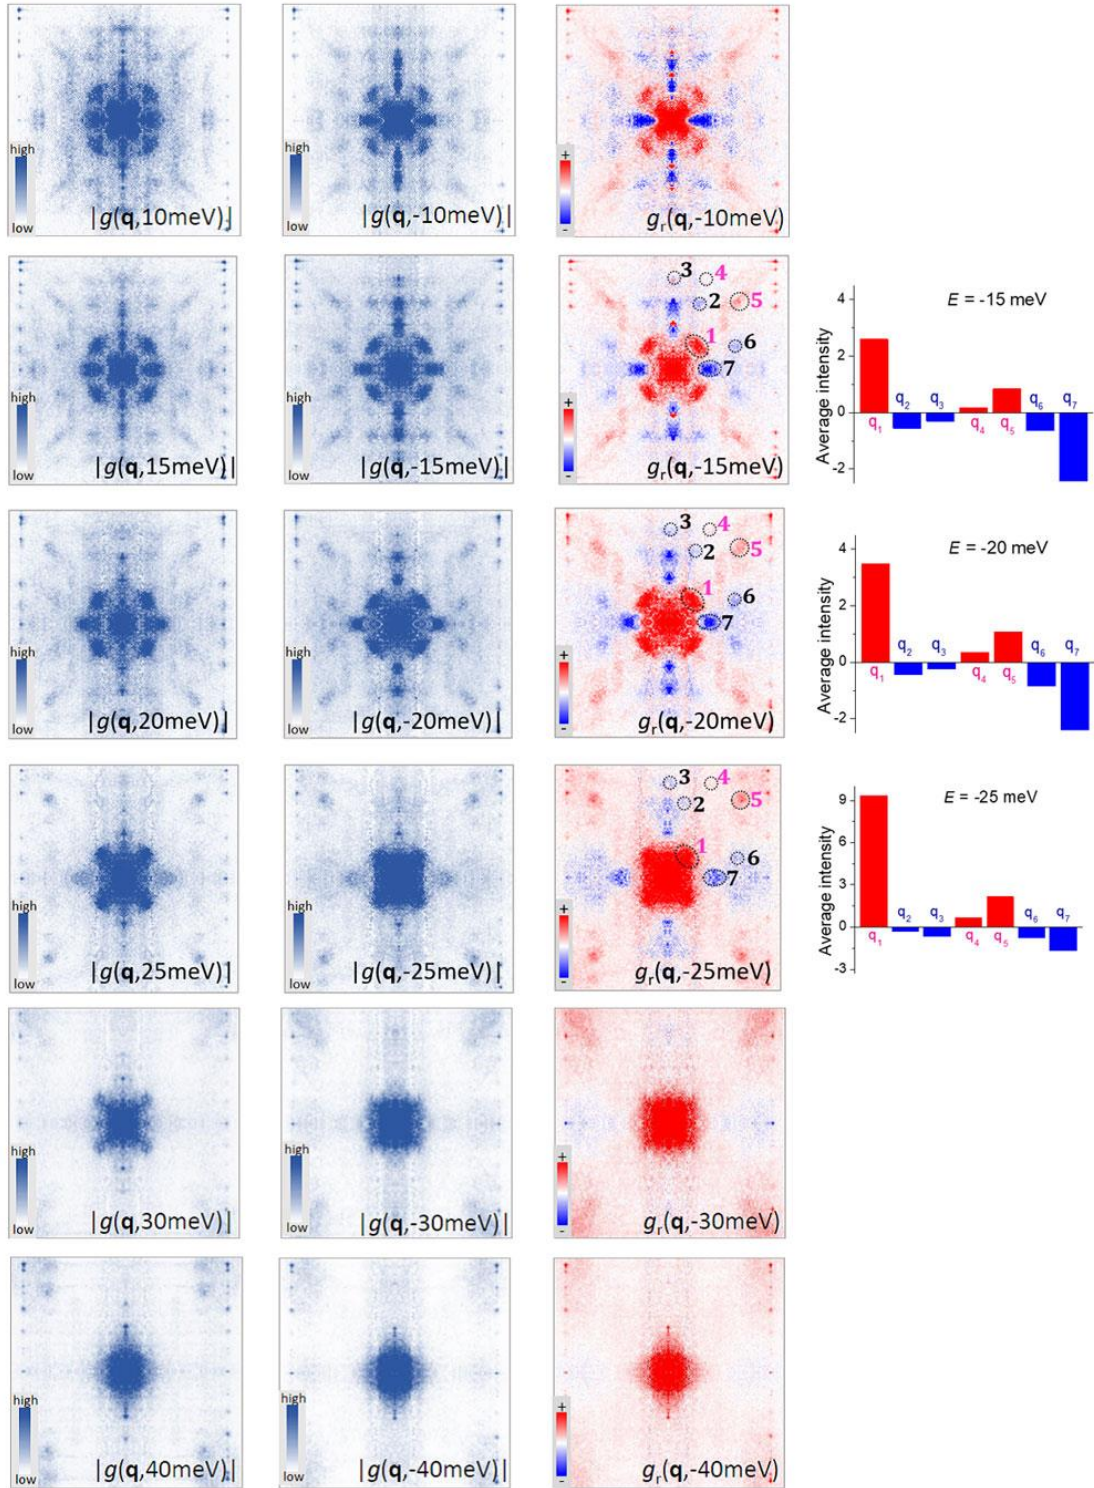

**Supplementary Figure 6** Control experiments of FT-QPI patterns and corresponding PR-QPI patterns at different energies measured in area-1 on sample 2. The left two columns show the FT-QPI intensity maps. The 3<sup>rd</sup> column shows the PR-QPI patterns out of the corresponding data. The 4<sup>th</sup> column shows the PR-QPI intensity of the seven characteristic spots derived from the 3<sup>rd</sup> column. The PR-QPI pattern at -20 meV is the same as the one in Fig. 6a.  $V_{\text{set}} = -100$  mV,  $I_{\text{set}} = 100$  pA.

Area 2, Sample 2

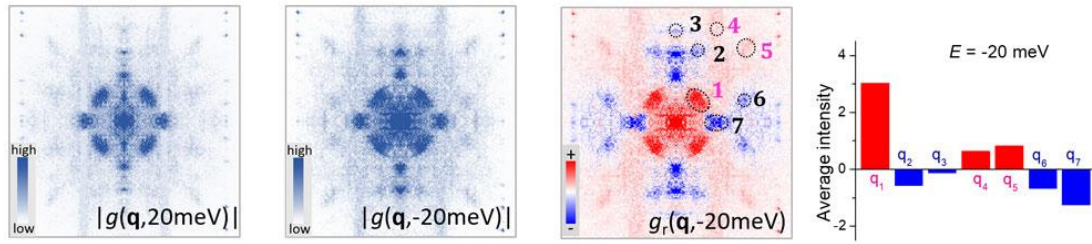

Sample 3

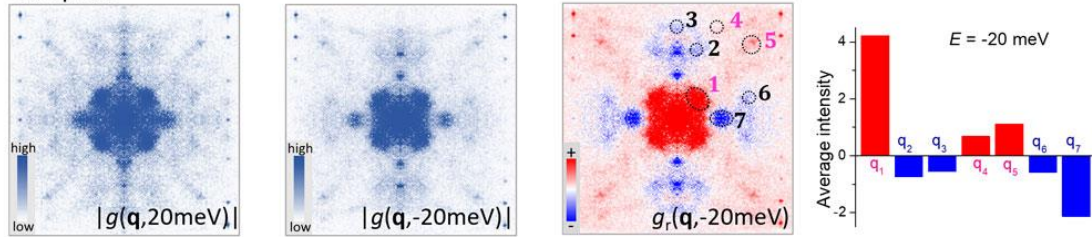

**Supplementary Figure 7** Control experiments of FT-QPI patterns and corresponding PR-QPI patterns at  $\pm 20$  meV measured in area-2 of sample 2 and in an area of sample 3. The left two columns show the FT-QPI intensity maps. The 3<sup>rd</sup> column shows the PR-QPI patterns out of the corresponding data. The 4<sup>th</sup> column shows the PR-QPI intensity of the seven characteristic spots derived from the 3<sup>rd</sup> column.  $V_{\text{set}} = -100$  mV,  $I_{\text{set}} = 100$  pA.



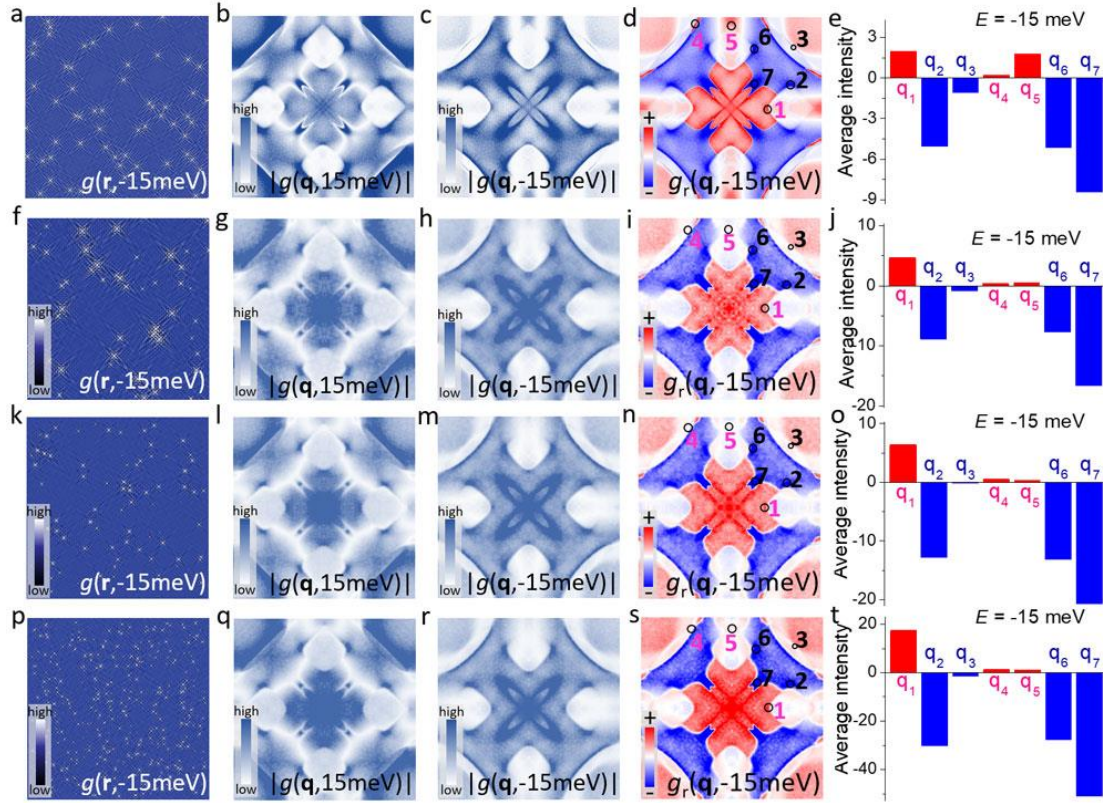

**Supplementary Figure 8** Theoretical simulated PR-QPI results for the case of multiple non-magnetic impurities with a  $d$ -wave superconducting gap function. **a-e** Simulation results for the case of 60 same impurities with same scattering potential  $V_s = 20$  meV. These impurities are randomly distributed in an area with dimensions of  $512 \times 512$  atom lattice as shown in **a**. **f-t** Simulation results for the cases of 60 (**f-j**), 100 (**k-o**) and 500 (**p-t**) randomly distributed impurities with the random scattering potential values from 0 to 100 meV. The areas are also with dimensions of  $400 \times 400$  atom lattice. One can see that the signs of PR-QPI signal for the characteristic scattering spots are the same as the ones of the single impurity situation.

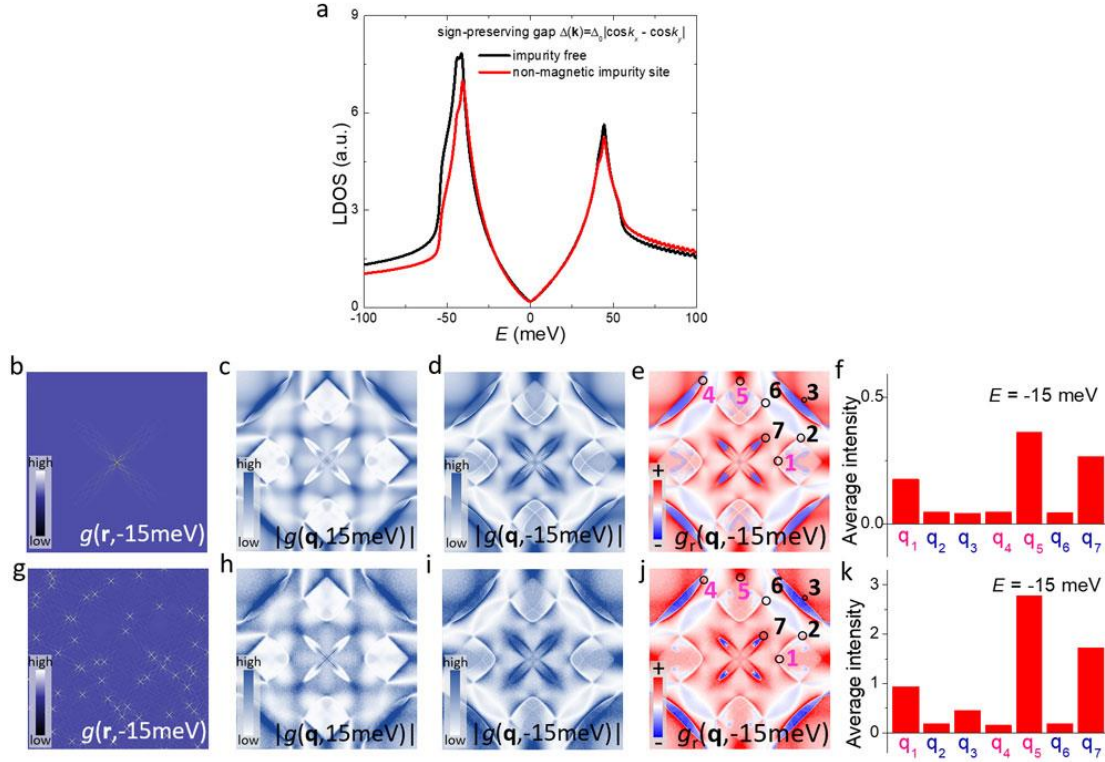

**Supplementary Figure 9** Theoretical simulated PR-QPI results with a sign-preserved nodal gap function. **a** The tunneling spectra in an impurity-free area and on site of the non-magnetic impurity for a superconductor with a nodal but sign-preserved gap. The Fermi surface is the same as the one in Supplementary Figure 2, and the superconducting gap function used in the calculation is  $\Delta(\mathbf{k}) = \Delta_0 |(\cos k_x - \cos k_y)|$  with  $\Delta_0 = 23$  meV. The scattering scalar potential is set to  $V_s = 20$  meV for the non-magnetic impurity. **b** Simulated LDOS around a single non-magnetic impurity at  $-15$  meV with dimensions of  $512 \times 512$  atom lattice. The impurity is set to be at the center of the image. **c, d** FT-QPI patterns at  $\pm 15$  meV for the single impurity. **e** The resultant PR-QPI image  $g_r(\mathbf{q}, -15$  meV) calculated by DBS-QPI method from the simulation results in **c** and **d**. **f** Average intensity per pixel for the characteristic scattering spots in **e**. One can see that the  $g_r(\mathbf{q}, -15$  meV) values near all characteristic scattering vectors are positive. **g-k** The corresponding simulation results for the case of multiple impurities. The 60 impurities are the same as the one in **b**, and they are randomly distributed in an area with dimensions of  $512 \times 512$  atom lattice as shown in **g**. The locations of impurities are the same as the ones in Supplementary Figure 8a.

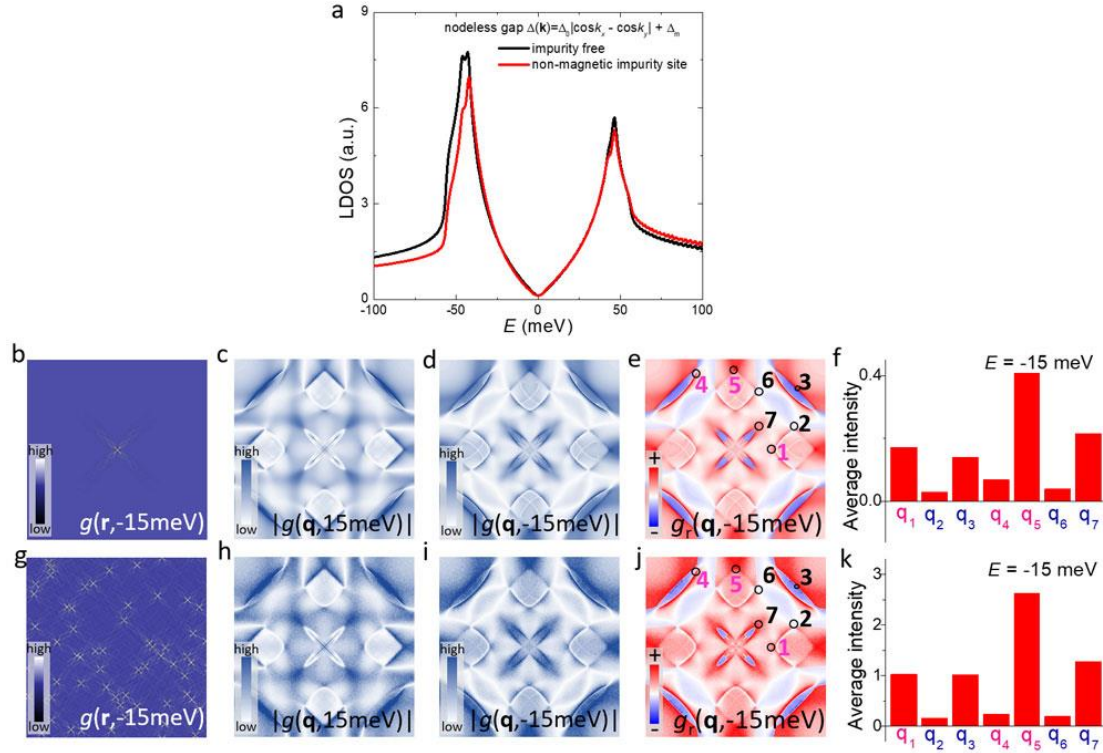

**Supplementary Figure 10** Theoretical simulated PR-QPI results with a sign-preserved nodeless gap function. **a** The tunneling spectra in an impurity-free area and on site of the non-magnetic impurity for a superconductor with a sign-preserved nodeless gap. The Fermi surface is the same as the one in Supplementary Figure 2, and the superconducting gap function used in the calculation is  $\Delta(\mathbf{k}) = \Delta_0 |\cos k_x - \cos k_y| + \Delta_m$  with  $\Delta_0 = 23$  meV,  $\Delta_m = 2$  meV. The scattering scalar potential is set to  $V_s = 20$  meV for the non-magnetic impurity. **b** Simulated LDOS around a single non-magnetic impurity at  $-15$  meV with dimensions of  $60 \times 60$  atom lattice. The impurity is set to be at the center of the image. **c,d** FT-QPI patterns for the single impurity at  $\pm 15$  meV. **e** The resultant PR-QPI image  $g_r(\mathbf{q}, -15$  meV) calculated by DBS-QPI method from the simulation results in **c** and **d**. **f** Average intensity per pixel for the characteristic scattering spots in **e**. One can see that the  $g_r(\mathbf{q}, -15$  meV) values near all characteristic scattering vectors are positive. **g-k** The corresponding simulation results for the case of multiple impurities. The 60 impurities are the same as the one in **a**, and they are randomly distributed in an area with dimensions of  $512 \times 512$  atom lattice as shown in **g**. The locations of impurities are the same as the ones in Supplementary Figure 8a.

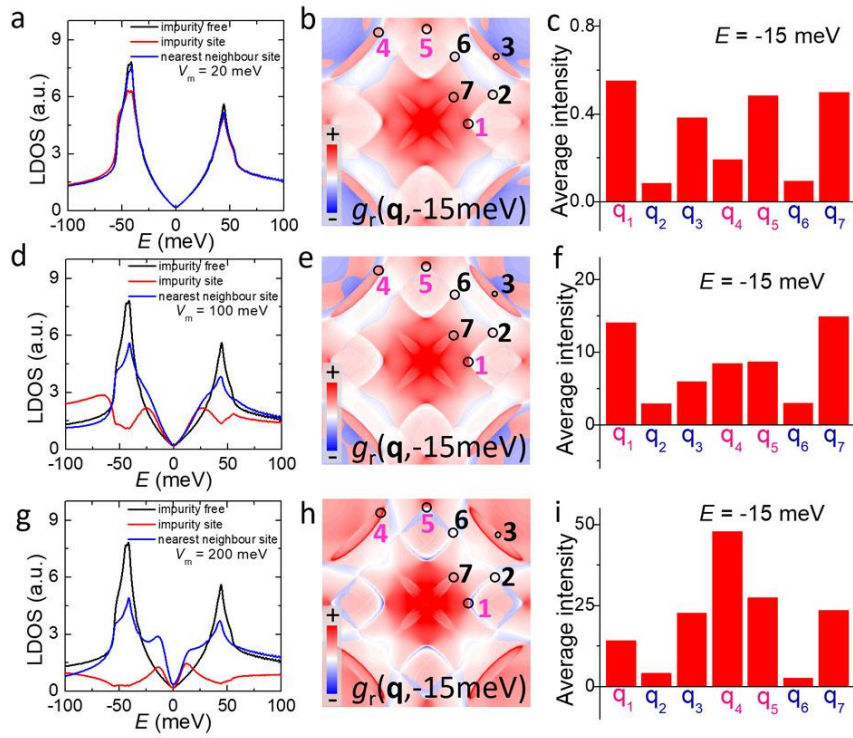

**Supplementary Figure 11** Simulated results around a single magnetic impurity with different magnetic scattering potentials in a  $d$ -wave superconductor.
